# Supplementary material for: Expression of IL-20 Receptor Subunit β Is Linked to EAE Neuropathology and CNS Neuroinflammation
Source: PubMed Central journal article supplement (PMC8452993; doi:10.3389/fncel.2021.683687), 2021-09-07
Supplement: Image_1.pdf [file Image_1.pdf]

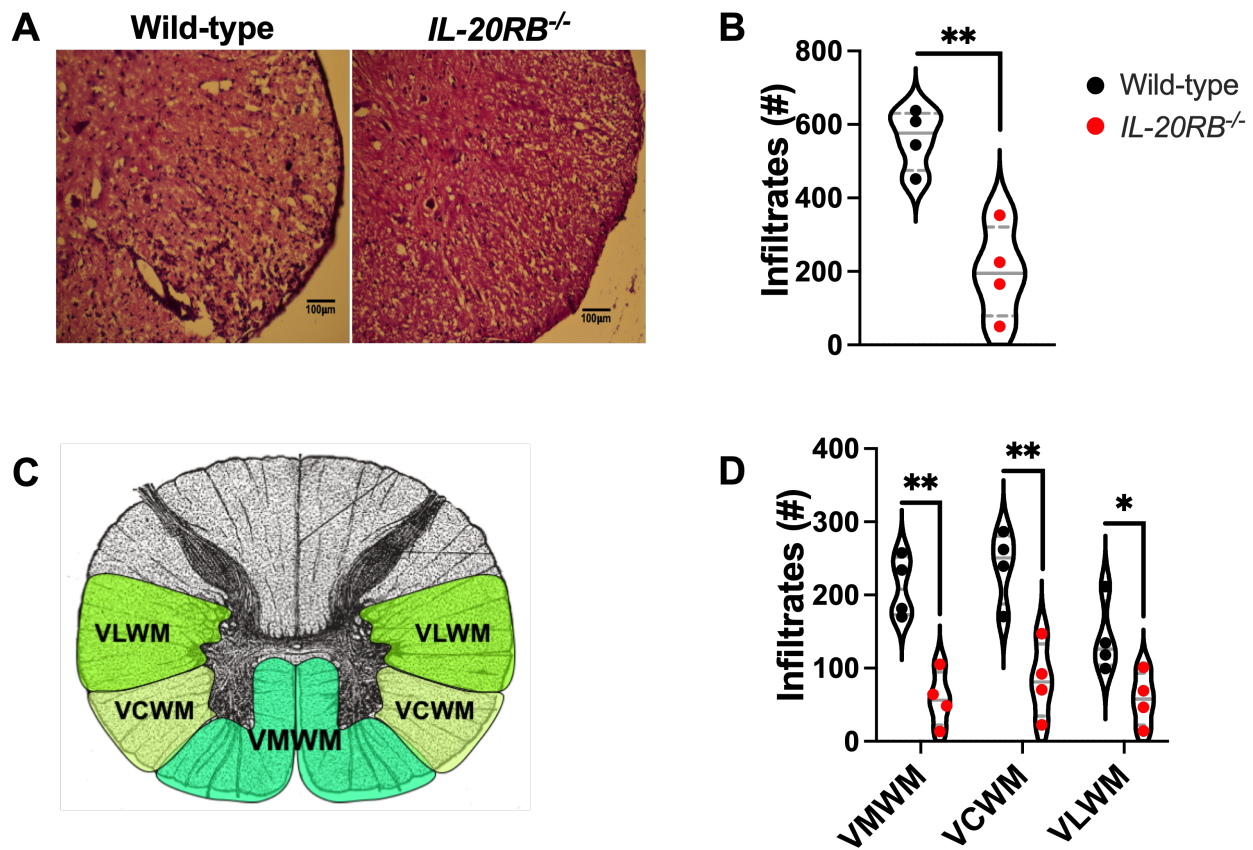

**Supplemental Figure 1. *IL-20RB*<sup>-/-</sup> mice exhibits reduction of perivascular infiltrates.** *IL-20RB*<sup>-/-</sup> mice and wild-type mice were actively immunized for EAE and euthanized at peak (~14 dpi) for histological analysis, n = 4. H&E staining was performed on spinal cords, following standardized protocols (representative image, scale bar = 100  $\mu$ m, **A**). Means of total number of perivascular infiltrates throughout ventral white matter were analyzed by unpaired t-test showed statistical significance between wild-type and *IL-20RB*<sup>-/-</sup> mice (mean  $\pm$  SEM: 560.4  $\pm$  41.15 vs 198.4  $\pm$  63.06) p <0.01 (**B**). Perivascular infiltrates were also analyzed based on location: ventromedial white matter, VMWM; ventral column white matter, VCWM and ventrolateral white matter, VLWM (**C**). Comparison of perivascular infiltrates between wild-type and *IL-20RB*<sup>-/-</sup> mice and analysis by Two-Way ANOVA analysis followed by Sidak's post hoc test showed statistical significance for VMWM (mean  $\pm$  SEM: 210.75  $\pm$  20.90.15 vs 57.75  $\pm$  18.96), p <0.01, VCWM (mean  $\pm$  SEM: 239.63  $\pm$  24.96.15 vs 83.00  $\pm$  25.81), and VLWM (mean  $\pm$  SEM: 140.88  $\pm$  24.60 vs 57.63  $\pm$  18.34), p <0.05 (**D**). Results are shown as Mean  $\pm$  SEM, \* = p <0.05 and \*\* = p <0.01.
