# Supplementary material for: Expression of IL-20 Receptor Subunit β Is Linked to EAE Neuropathology and CNS Neuroinflammation
Source: PubMed Central journal article supplement (PMC8452993; doi:10.3389/fncel.2021.683687), 2021-09-07
Supplement: Image_3.pdf [file Image_3.pdf]

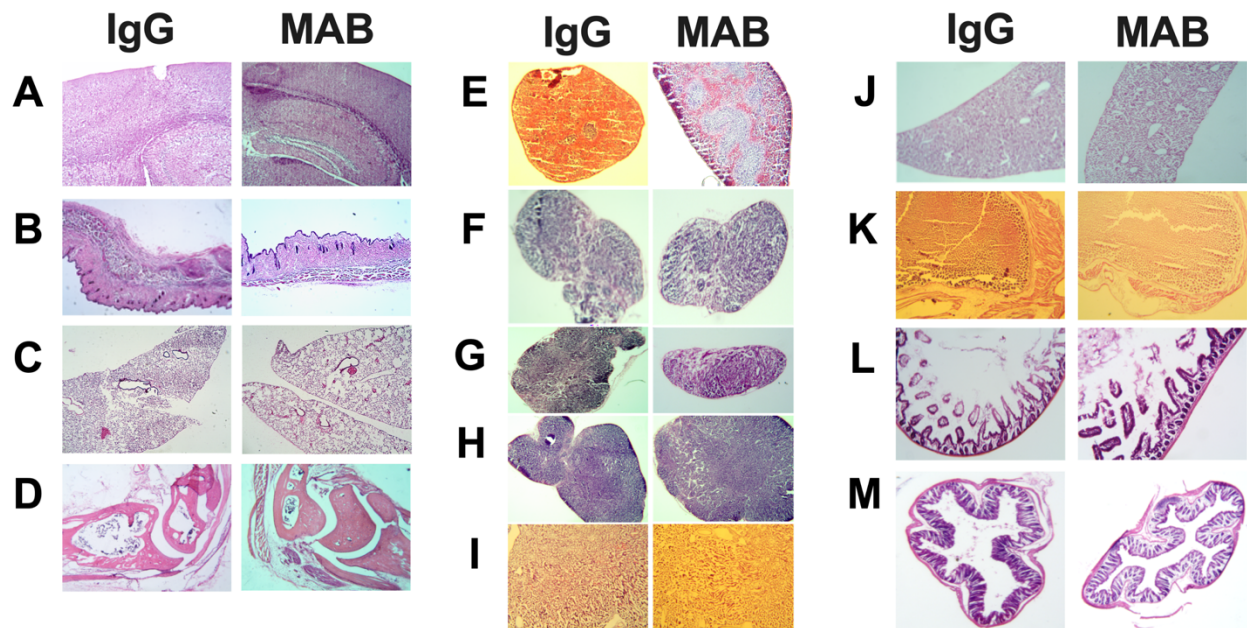

**Supplemental Figure 3. Necropsy of sham-immunized mice treated with MABIL-20 and IgG<sub>2b</sub>.** C57BL6/J mice, male and female, n = 4, were treated with 10 mg/kg BW of rat monoclonal anti-IL-20 (MABIL-20) and IgG<sub>2B</sub> isotype control, 10 days after sham immunization to assess safe use of monoclonal antibody. Treatment continued for 10 days, then mice were euthanized for histological analysis. Comparison between MABIL-20 and IgG<sub>2B</sub> tissues were unremarkable. Representative images for brain (A), skin (B), lung (C), knee (D), spleen (E), cervical, axillary, inguinal lymph nodes (F-H, respectively), kidney (I), liver (J), stomach (K), small and large intestine (L, M, respectively).
