# Supplementary material for: Expression of IL-20 Receptor Subunit β Is Linked to EAE Neuropathology and CNS Neuroinflammation
Source: PubMed Central journal article supplement (PMC8452993; doi:10.3389/fncel.2021.683687), 2021-09-07
Supplement: Image_4.pdf [file Image_4.pdf]

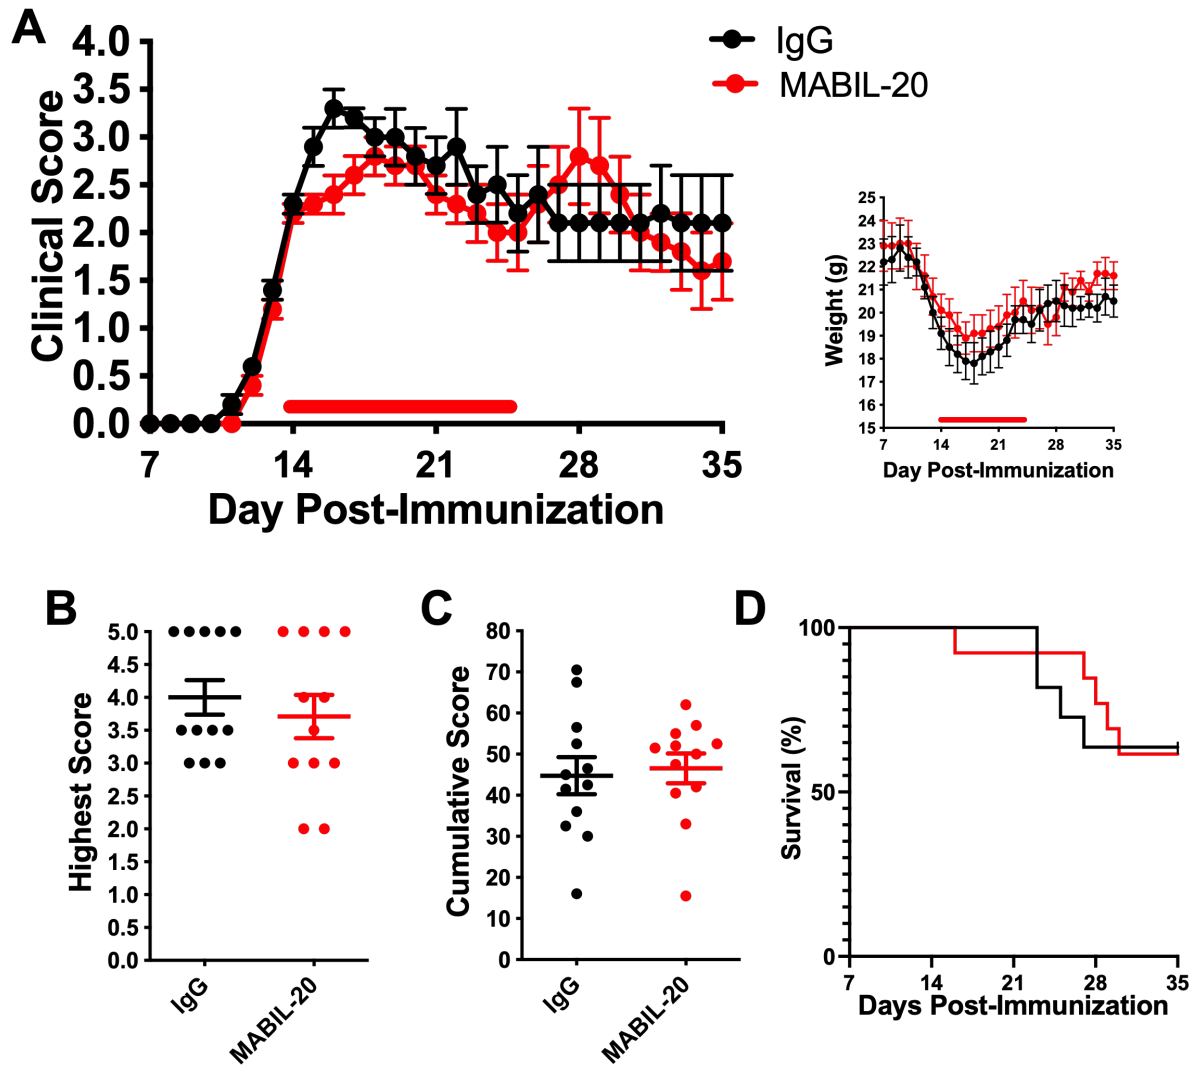

**Supplemental Figure 4. Neutralization of IL-20 cytokine has no impact on clinical progression of EAE.** Ten week-old C57BL6/J mice, male and female, were actively immunized for EAE, sham-immunized (not show) as control (EAE,  $n = 12$ ; sham,  $n = 4$ ). Treatment with 10 mg/kg BW of rat monoclonal anti-IL-20 (MABIL-20) and IgG<sub>2B</sub> isotype control started when mice reached a score or 2 (hindlimb paresis). Clinical score, body weight, highest and cumulative scores from 7 dpi to 35 dpi were analyzed by unpaired t-test and changes were not deemed significant (A-C). Analysis of survival curve was also not significant (D). Results are shown as Mean  $\pm$  SEM.
