# Supplementary material for: Expression of IL-20 Receptor Subunit β Is Linked to EAE Neuropathology and CNS Neuroinflammation
Source: PubMed Central journal article supplement (PMC8452993; doi:10.3389/fncel.2021.683687), 2021-09-07
Supplement: Image_5.pdf [file Image_5.pdf]

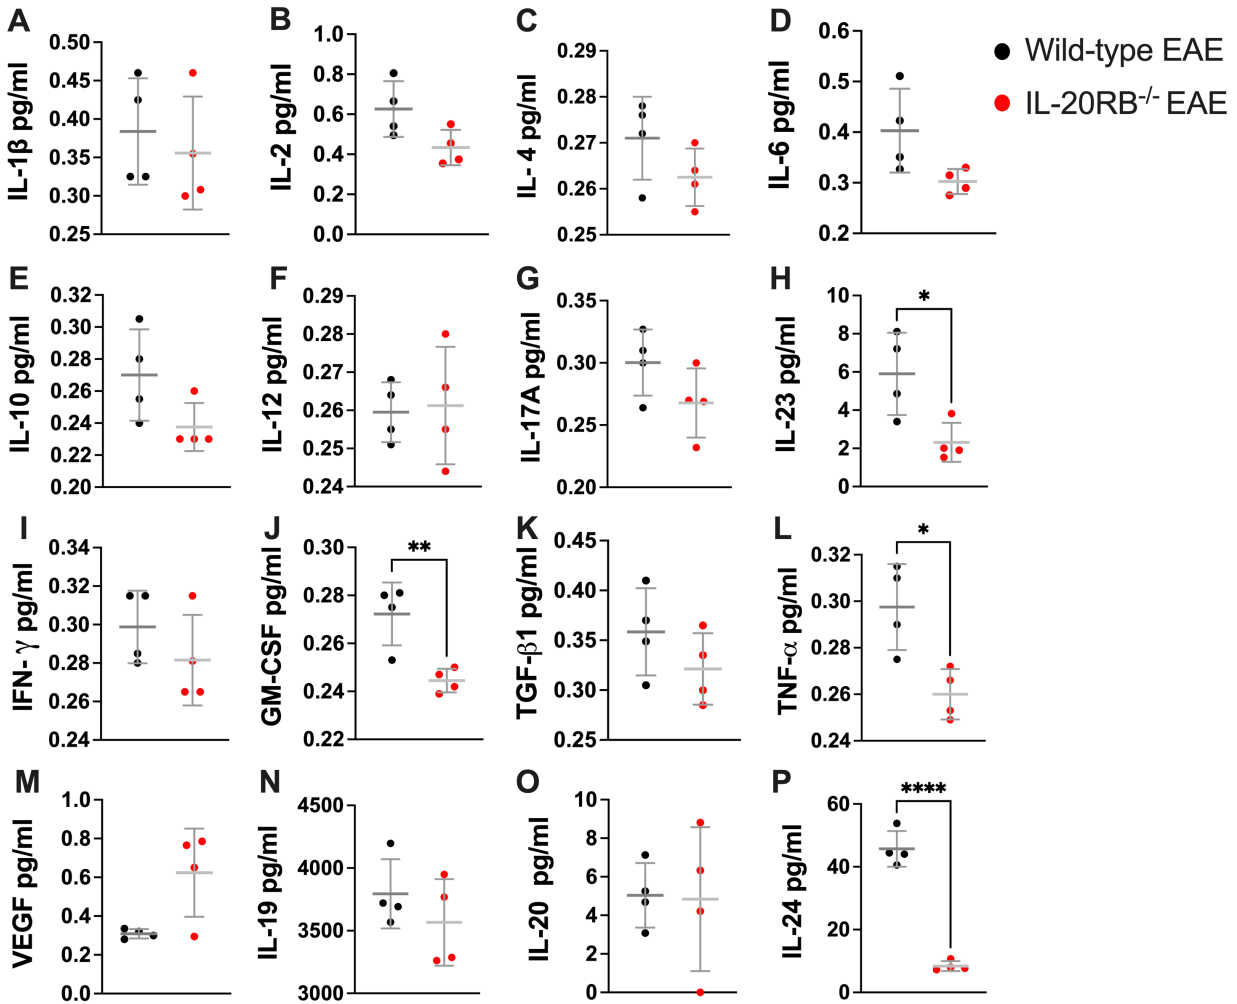

**Supplemental Figure 5. Cortical cytokine expression of wild-type mice and *IL-20RB*<sup>-/-</sup> mice at peak of EAE.** Cytokines and VEGF expression within cortical tissues were detected by multianalyte bead-based immunoassay (A-M) and ELISA (N-P), n = 4 (same cohort of mice shown on Figure 3 and Supplemental Figures 6-8), for wild-type mice at peak of EAE (peak, ~14 dpi) (black circle) and sham-immunized, *IL-20RB*<sup>-/-</sup> mice (red circle) and sham-immunized (sham-immunized not shown). One-Way ANOVA analysis followed by Sidak's post hoc comparing wild-type mice and *IL-20RB*<sup>-/-</sup> mice at peak of EAE showed statistical significance for IL-23, p < 0.05 (H), GM-CSF, p < 0.01 (J), TNF-α, p < 0.05 (L), and IL-24, p < 0.0001 (P). Results are shown as Mean ± SEM, \* = p < 0.05, \*\* = p < 0.01 and \*\*\*\* = p < 0.0001.
