# Supplementary material for: Expression of IL-20 Receptor Subunit β Is Linked to EAE Neuropathology and CNS Neuroinflammation
Source: PubMed Central journal article supplement (PMC8452993; doi:10.3389/fncel.2021.683687), 2021-09-07
Supplement: Image_8.pdf [file Image_8.pdf]

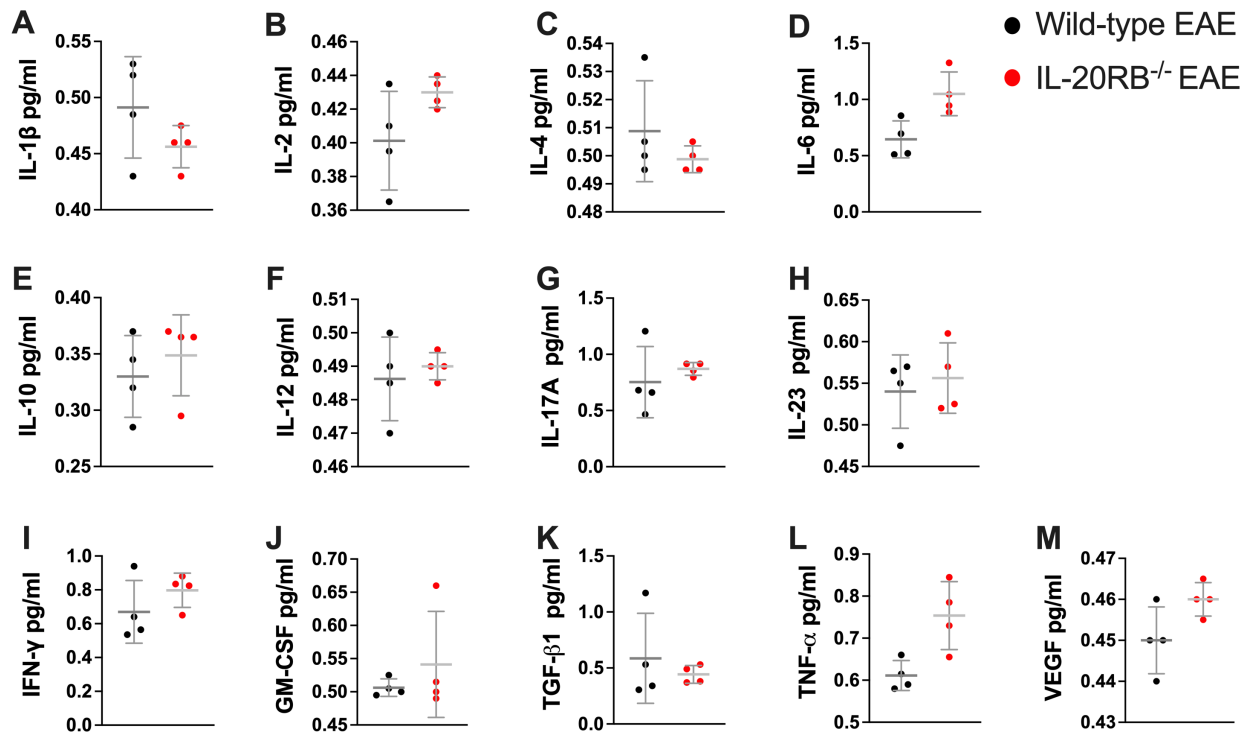

**Supplemental Figure 8. Cytokine expression from serum of wild-type mice and *IL-20RB*<sup>-/-</sup> mice at peak of EAE.** Serum cytokines and VEGF levels were detected by multianalyte bead-based immunoassay (A-M), n = 4 (same cohort of mice shown on Figure 3 and Supplemental Figure 5), for wild-type mice at peak of EAE (peak, ~14 dpi) (black circle) and sham-immunized, *IL-20RB*<sup>-/-</sup> mice (red circle) and sham-immunized (sham-immunized not shown). Data was analyzed by One-Way ANOVA analysis followed by Sidak's post hoc and changes were not deemed significant. Results are shown as Mean  $\pm$  SEM.
