# Supplementary material for: Expression of IL-20 Receptor Subunit β Is Linked to EAE Neuropathology and CNS Neuroinflammation
Source: PubMed Central journal article supplement (PMC8452993; doi:10.3389/fncel.2021.683687), 2021-09-07
Supplement: Image_9.pdf [file Image_9.pdf]

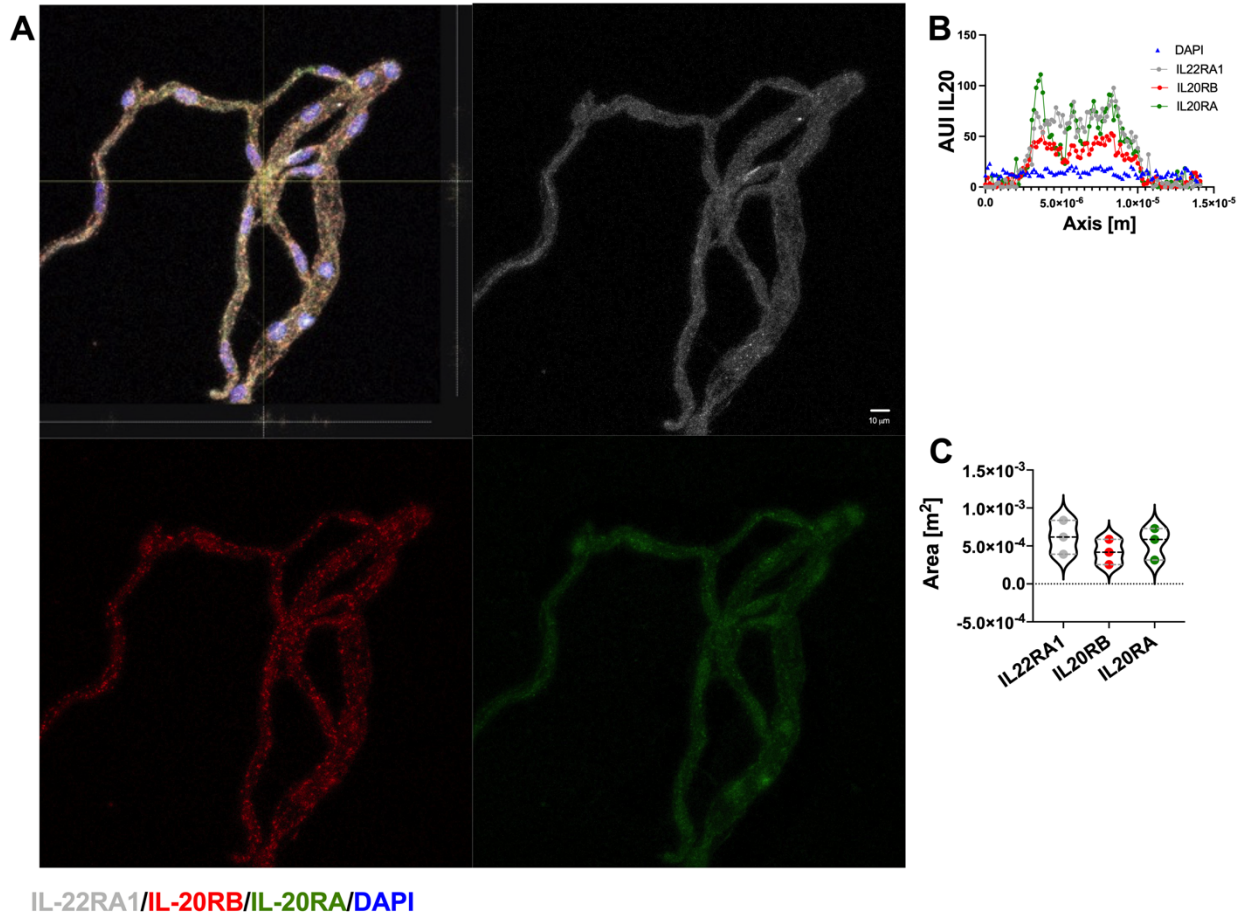

**Supplemental Figure 9. Murine expression of IL-20 receptor subunits.** Murine microvessels were isolated from naïve C57BL/6J mice,  $n = 3$ , to elucidate IL-20 receptor subunits protein expression by immunolabeling for IL-22RA1 (white), IL-20RB (red), IL-20RA (green), and DAPI (blue), scale bar =  $10 \mu\text{m}$  (A). Histogram analysis was performed to 25 microvessels per specimen to determine AUI and AUC of each receptor subunit (representative AUI vs axis plot histogram, B). Although AUC means exhibit a trend  $\text{IL-22RA1} > \text{IL-20RB} > \text{IL-20RA}$ , One-Way ANOVA analysis followed by Sidak's post hoc test showed that mean AUC differences between subunits are not statistically significant (mean  $\pm$  SD IL-22RA1:  $6.2 \times 10^{-4} \pm 2.2 \times 10^{-4}$ , IL-20RB:  $4.2 \times 10^{-4} \pm 1.7 \times 10^{-4}$ , and IL-20RA:  $5.4 \times 10^{-4} \pm 2.1 \times 10^{-4}$ , C). Results are shown as Mean  $\pm$  SD.
